# Supplementary material
Source: PubMed Central journal article supplement (PMC8152338)
Supplement: 12859_2021_4169_MOESM2_ESM.pdf [file 12859_2021_4169_MOESM2_ESM.pdf]

# **Cataloguing experimentally confirmed 80.7 kb-long *ACKR1* haplotypes from the 1000 Genomes Project database**

Kshitij Srivastava, Anne-Sophie Fratzscher, Bo Lan and Willy Albert Flegel

**Table S1.** Populations in the 1000GP database\*

| Population Description                                     | Population code | Super-population code | Individuals |          |            |
|------------------------------------------------------------|-----------------|-----------------------|-------------|----------|------------|
|                                                            |                 |                       | Total       | Analyzed | Percentage |
| Han Chinese in Beijing, China                              | CHB             | EAS                   | 103         | 83       | 80.58%     |
| Japanese in Tokyo, Japan                                   | JPT             | EAS                   | 104         | 78       | 75.00%     |
| Southern Han Chinese                                       | CHS             | EAS                   | 105         | 86       | 81.90%     |
| Chinese Dai in Xishuangbanna, China                        | CDX             | EAS                   | 93          | 71       | 76.34%     |
| Kinh in Ho Chi Minh City, Vietnam                          | KHV             | EAS                   | 99          | 71       | 71.72%     |
| Utah Residents with Northern and Western European Ancestry | CEU             | EUR                   | 99          | 25       | 25.25%     |
| Toscans in Italia                                          | TSI             | EUR                   | 107         | 24       | 22.43%     |
| Finnish in Finland                                         | FIN             | EUR                   | 99          | 30       | 30.30%     |
| British in England and Scotland                            | GBR             | EUR                   | 91          | 15       | 16.48%     |
| Iberian Population in Spain                                | IBS             | EUR                   | 107         | 28       | 26.17%     |
| Yoruba in Ibadan, Nigeria                                  | YRI             | AFR                   | 108         | 88       | 81.48%     |
| Luhya in Webuye, Kenya                                     | LWK             | AFR                   | 99          | 77       | 77.78%     |
| Gambian in Western Divisions in the Gambia                 | GWD             | AFR                   | 113         | 96       | 84.96%     |
| Mende in Sierra Leone                                      | MSL             | AFR                   | 85          | 66       | 77.65%     |
| Esan in Nigeria                                            | ESN             | AFR                   | 99          | 83       | 83.84%     |
| Americans of African Ancestry in SW USA                    | ASW             | AFR                   | 61          | 32       | 52.46%     |
| African Caribbeans in Barbados                             | ACB             | AFR                   | 96          | 58       | 60.42%     |
| Mexican Ancestry from Los Angeles USA                      | MXL             | AMR                   | 64          | 25       | 39.06%     |
| Puerto Ricans from Puerto Rico                             | PUR             | AMR                   | 104         | 21       | 20.19%     |
| Colombians from Medellin, Colombia                         | CLM             | AMR                   | 94          | 33       | 35.11%     |
| Peruvians from Lima, Peru                                  | PEL             | AMR                   | 85          | 31       | 36.47%     |
| Gujarati Indian from Houston, Texas                        | GIH             | SAS                   | 103         | 37       | 35.92%     |
| Punjabi from Lahore, Pakistan                              | PJL             | SAS                   | 96          | 39       | 40.63%     |
| Bengali from Bangladesh                                    | BEB             | SAS                   | 86          | 44       | 51.16%     |
| Sri Lankan Tamil from the UK                               | STU             | SAS                   | 102         | 49       | 48.04%     |
| Indian Telugu from the UK                                  | ITU             | SAS                   | 102         | 46       | 45.10%     |
|                                                            |                 | Total                 | 2504        | 1336     | 53.35%     |

\* Table adapted from the 1000 Genomes Project.<sup>22</sup>
